# Supplementary material
Source: PubMed Central journal article supplement (PMC7155195)
Supplement: pt0c00013_si_001.pdf [file pt0c00013_si_001.pdf]

## Supporting information

### **mGluR5 Contribution to Neuropathology in Alzheimer Mice Is Disease Stage-Dependent**

**Khaled S. Abd-Elrahman<sup>1,2,3#</sup>, Alison Hamilton<sup>1,2,#</sup>, Awatif Albaker<sup>1,2,4</sup> and Stephen S. G. Ferguson<sup>1,2,\*</sup>**

University of Ottawa Brain and Mind Institute<sup>1</sup>, Department of Cellular and Molecular Medicine<sup>2</sup>, University of Ottawa, 451 Smyth Road, Ottawa, Ontario, K1H 8M5, Canada.

Department of Pharmacology and Toxicology<sup>3</sup>, Faculty of Pharmacy, Alexandria University, Alexandria, 21521, Egypt.

Department of Pharmacology and Toxicology<sup>4</sup>, College of Pharmacy, King Saud University, Riyadh, 12371, Saudi Arabia.

#Co-first authors

\*Corresponding author

#### **Table of content**

**Figure S-1 (A-H):** Uncropped blots corresponding to Fig. 3D, 4A-D and 5A-C.

**Figure S-1 (I):** mGluR5 expression in wild-type and APP<sup>swe</sup>/PS1 $\Delta$ E9 mice

Figure S-1

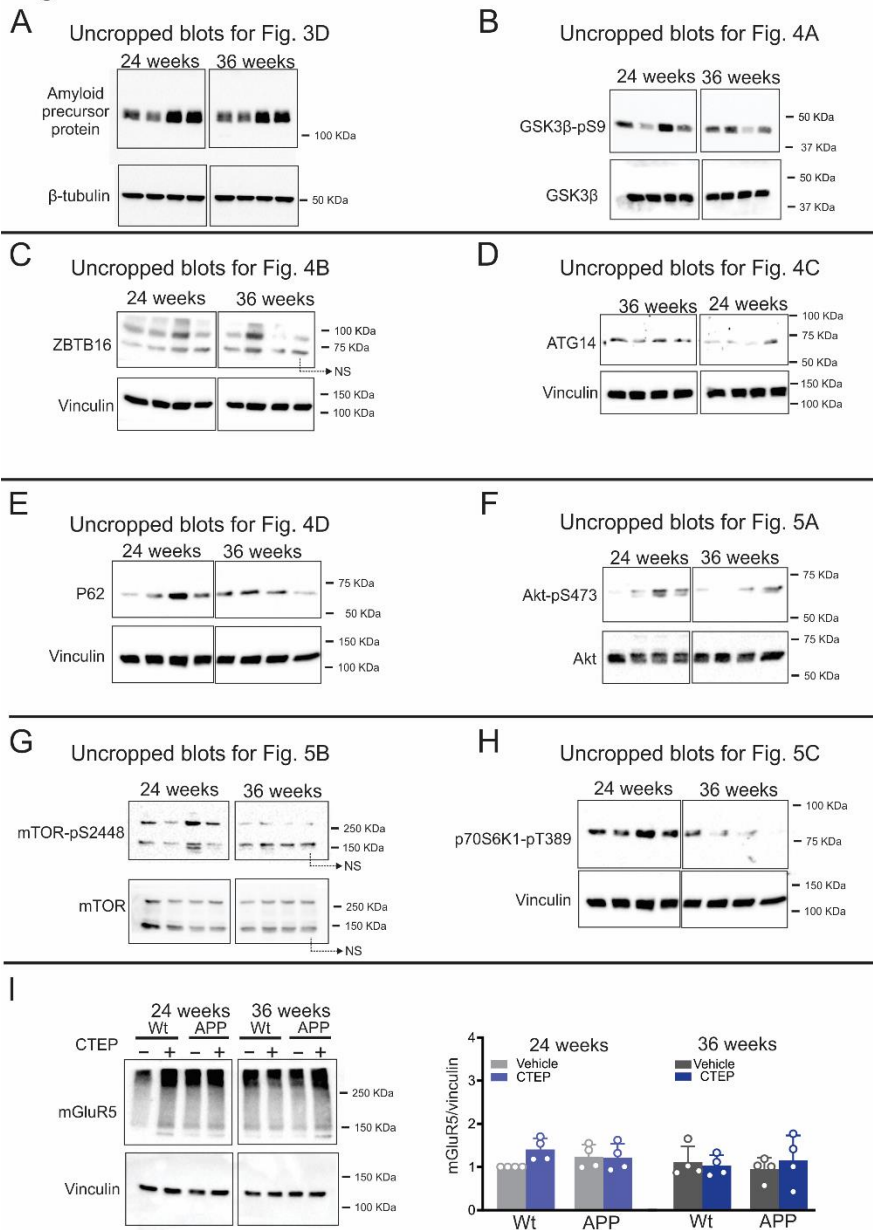

**Figure S-1:** Uncropped blots corresponding to **(A)** Fig. 3D **(B)** Fig. 4A, **(C)** Fig. 4B, **(D)** Fig. 4C, **(E)** Fig. 4D, **(F)** Fig. 5A, **(G)** Fig. 5B and **(H)** Fig 5C with the corresponding molecular weight markers. NS denotes non-specific bands. **(I)** Uncropped representative western blots and mean  $\pm$  SD of mGluR5 total expression in brain lysates from age-matched wildtype (Wt) and APP<sup>swe</sup>/PS1 $\Delta$ E9 (APP) mice after either a 24 week or 36 week treatment with either vehicle or CTEP (2mg/Kg). Values were expressed as a fraction of 24 week, vehicle-treated Wt values. Total mGluR5 expression was normalized to vinculin (n=4 for each group).
